# Supplementary material
Source: PubMed Central journal article supplement (PMC1564092)
Supplement: rspb20043048s03.pdf [file rspb20043048s03.pdf]

# ELECTRONIC APPENDIX

This is the Electronic Appendix to the article

**Sperm competition and the evolution of male  
reproductive anatomy in rodents**

by

Steven A. Ramm, Geoffrey A. Parker and Paula Stockley

*Proc. R. Soc. B* ([doi:10.1098/rspb.2004.3048](https://doi.org/10.1098/rspb.2004.3048))

Electronic appendices are refereed with the text; however, no attempt is made to impose a uniform editorial style on the electronic appendices.

# **Sperm competition and the evolution of male reproductive anatomy in rodents**

Steven A. Ramm, Geoffrey A. Parker and Paula Stockley

## **Supplementary information**

### **Appendix A**

Phylogenies used for comparative analyses.

### **Appendix B**

Relative testis sizes and prevalence of within-litter multiple paternity in rodents.

### **Appendix C**

Body, testis and accessory reproductive gland masses of 42 rodent species.

### **Appendix D**

Copulatory plug size, vaginal length and relative testis size in rodents.

**Appendix A (i)**

Phylogeny used for GLS analysis of relative testis size and multiple paternity data.

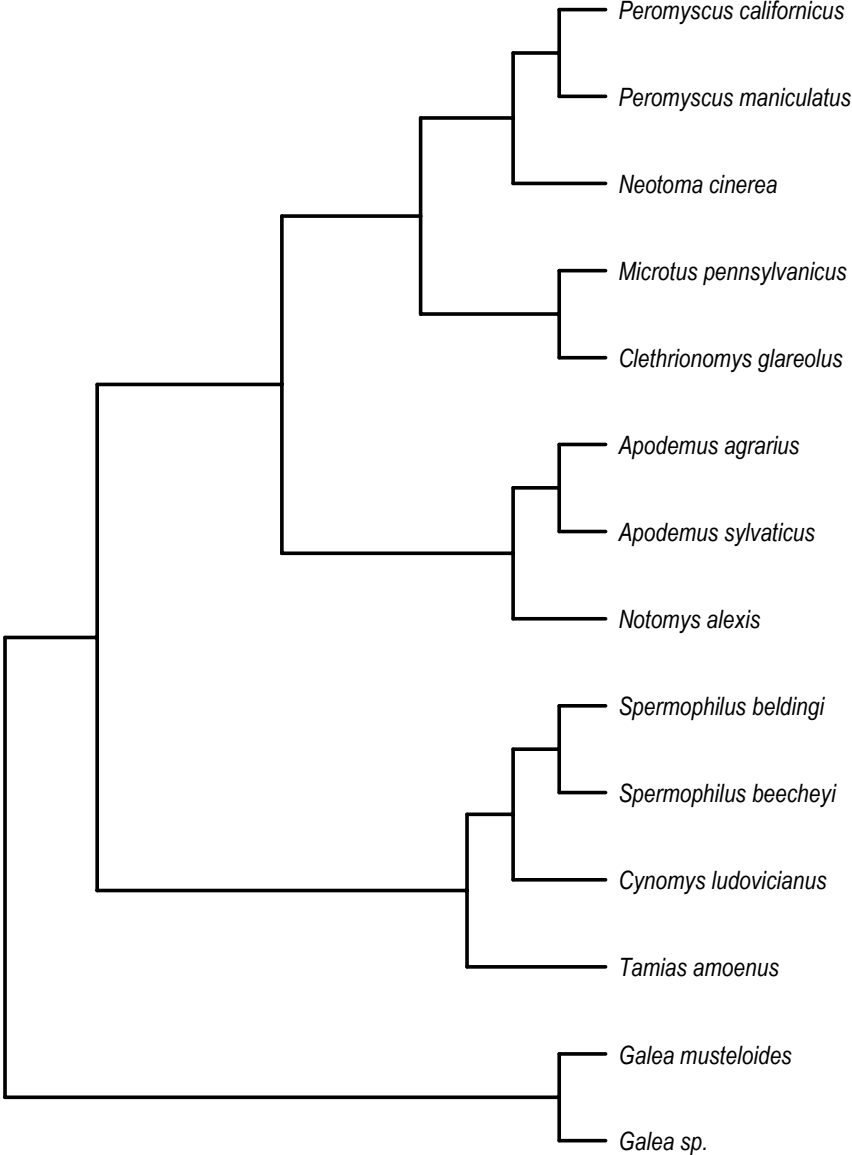

**Appendix A (ii)**

Phylogeny used for GLS analysis of accessory glands data.

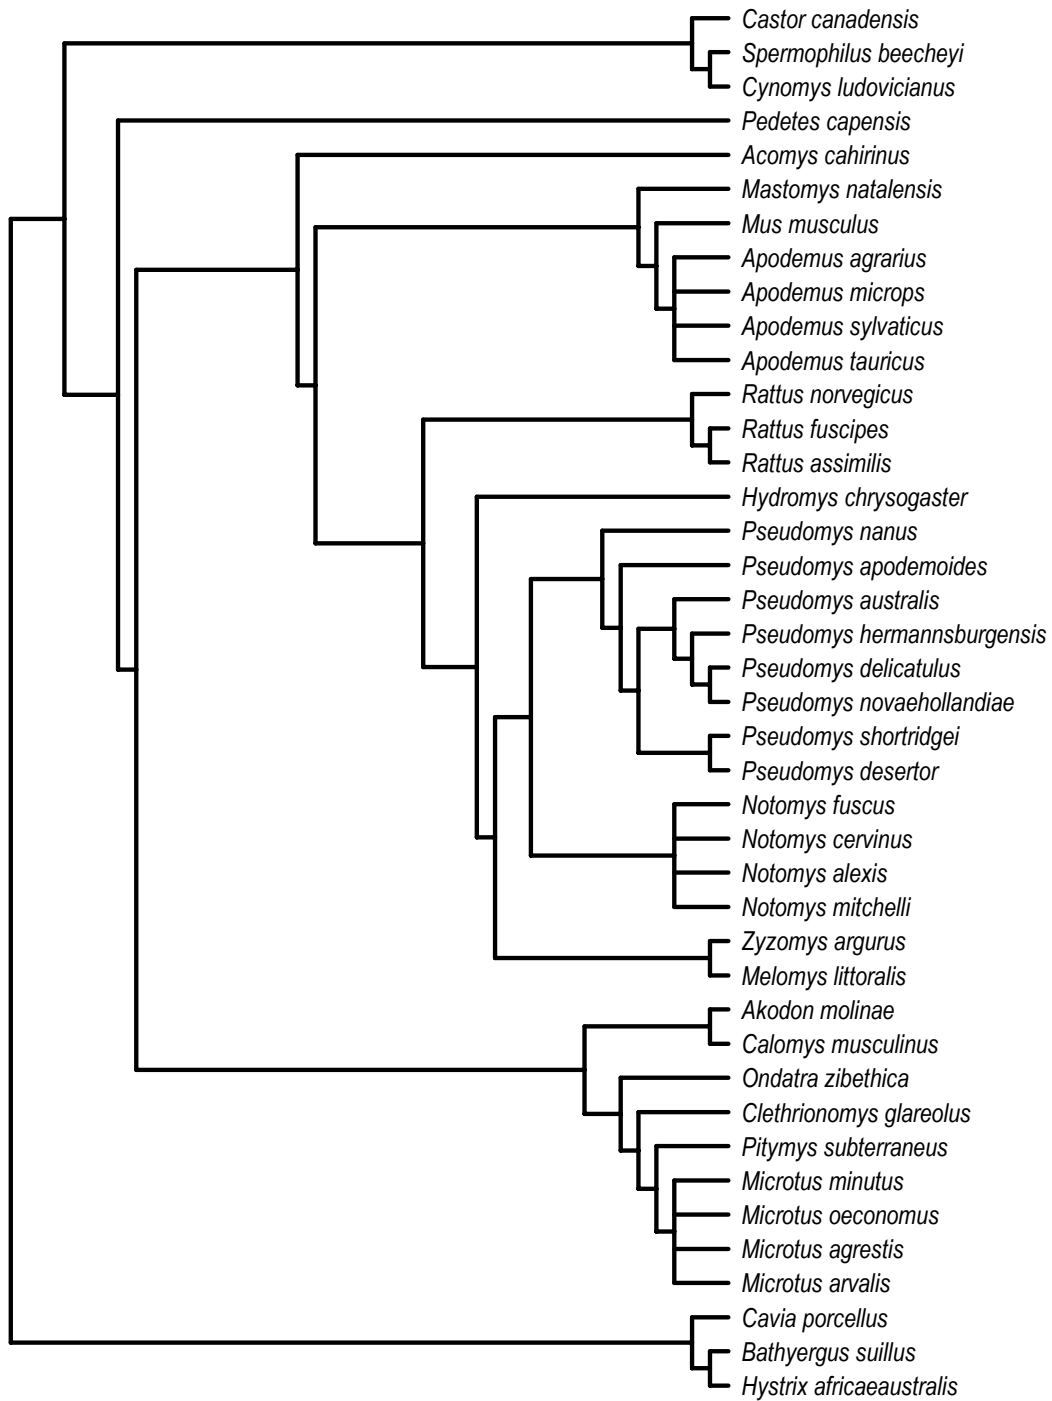

**Appendix A (iii)**

Phylogeny used for GLS analysis of copulatory plug size data.

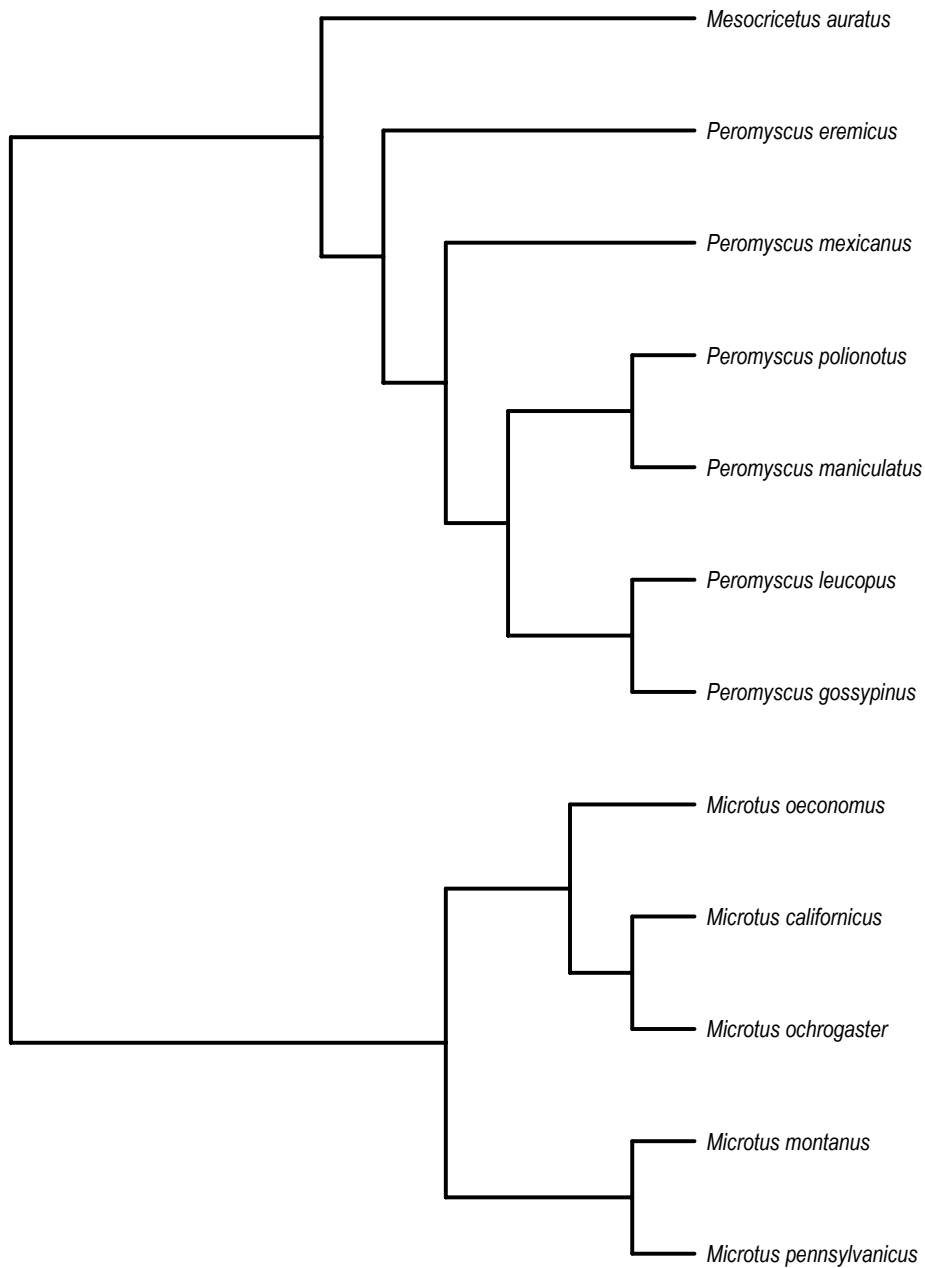

**Phylogenetic sources:** Hooper & Musser (1964); Baverstock et al. (1981); Stangl & Baker (1984); Corbet & Hill (1991); Watts et al. (1992); Martin et al. (2000); Liu et al. (2001); Herron et al. (2004); Stepan et al. (2004).

## Appendix B

Relative testis sizes, prevalence of within-litter multiple paternity and litter size in rodents.

| Species                        | RTS <sup>1</sup> | MP <sup>2</sup> | LS <sup>3</sup>   | Source(s)                                                                         |
|--------------------------------|------------------|-----------------|-------------------|-----------------------------------------------------------------------------------|
| <i>Apodemus agrarius</i>       | 2.99             | 80              | 6.50              | Kenagy & Trombulak 1986; Baker et al. 1999                                        |
| <i>A. sylvaticus</i>           | 2.27             | 50              | 4.67              | Kenagy & Trombulak 1986; Baker et al. 1999                                        |
| <i>Clethrionomys glareolus</i> | 1.94             | 35.5            | 4.17              | Kenagy & Trombulak 1986; Ratkiewicz & Borkowska 2000; Hayssen et al. 1993         |
| <i>Cynomys ludovicianus</i>    | 0.24             | 3.95            | 3.88              | Foreman 1998; Hoogland & Foltz 1982, Hoogland 1995; Hayssen et al. 1993           |
| <i>Galea musteloides</i>       | 2.33             | 83.3            | 3.09              | Sachser et al. 1999; Hayssen et al. 1993                                          |
| <i>G. sp.</i>                  | 1.62             | 0               | 1.28 <sup>4</sup> | Hohoff et al. 2002                                                                |
| <i>Microtus pennsylvanicus</i> | 1.73             | 14.6            | 4.88              | Pierce et al. 1990; Boonstra et al. 1993; Hayssen et al. 1993                     |
| <i>Neotoma cinerea</i>         | 0.66             | 0               | 3.40              | A. Schulte-Hostedde, unpubl. data; Topping & Millar 1998; Hayssen et al. 1993     |
| <i>Notomys alexis</i>          | 0.11             | 0               | 4.00              | Kenagy & Trombulak 1986; Breed & Adams 1992; Hayssen et al. 1993                  |
| <i>Peromyscus californicus</i> | 0.02             | 0               | 2.03              | Nelson et al. 1995; Ribble 1991; Hayssen et al. 1993                              |
| <i>P. maniculatus</i>          | 1.29             | 10.3            | 4.78              | Kenagy & Trombulak 1986; Birdsall & Nash 1973                                     |
| <i>Spermophilus beecheyi</i>   | 1.64             | 89.0            | 5.62              | Kenagy & Trombulak 1986; Boellstorf et al. 1994; Hayssen et al. 1993              |
| <i>S. beldingi</i>             | 1.20             | 77.8            | 5.70              | McKeever 1963; Hanken & Sherman 1981; Hayssen et al. 1993                         |
| <i>Tamias amoenus</i>          | 1.11             | 59.5            | 5.32              | Schulte-Hostedde & Millar 2004; Schulte-Hostedde et al. 2004; Hayssen et al. 1993 |

<sup>1</sup> relative testis size (based on the rodent regression equation calculated by Kenagy and Trombulak 1986);

<sup>2</sup> percentage of litters reported with multiple paternity.

<sup>3</sup> litter size.

<sup>4</sup> minimum litter size from data reported.

## Appendix C

Body, testis and accessory reproductive gland masses of 43 rodent species.

| Species                           | <i>n</i> | BM <sup>1</sup> (g) | TM <sup>2</sup> (g) | SVM <sup>3</sup> (g) | APM <sup>4</sup> (g) | VPM <sup>5</sup> (g) | Source(s)                                 |
|-----------------------------------|----------|---------------------|---------------------|----------------------|----------------------|----------------------|-------------------------------------------|
| <i>Acomys cahirinus</i>           | 5        | 75.5                | 0.512               | 0.2711               | 0.0295               | 0.0378               | Dewsbury & Hodges 1987; Peitz et al. 1979 |
| <i>Akodon molinae</i>             | 10       | 41.49               | 0.446               | 0.23                 | 0.0289               | 0.0542               | Yunes & Castro-Vazquez 1990               |
| <i>Apodemus agrarius</i>          | 141      | 21.8                | 0.994               |                      |                      | 0.0234               | Humiński 1969                             |
| <i>A. microps</i>                 | 8        | 19.2                | 0.326               |                      |                      | 0.0108               | Humiński 1969                             |
| <i>A. sylvaticus</i> <sup>6</sup> | 33       | 23.1                | 0.788               |                      |                      | 0.026                | Humiński 1969                             |
| <i>A. sylvaticus</i> <sup>6</sup> | 5        | 26.4                | 1.397               | 0.578                |                      |                      | Eriksson 1981                             |
| <i>A. tauricus</i>                | 61       | 29.1                | 0.891               |                      |                      | 0.0243               | Humiński 1969                             |
| <i>Bathyergus suillus</i>         | 4        | 750                 | 2.205               | 0.6488               |                      |                      | Van der Horst 1972                        |
| <i>Calomys musculinus</i>         | 8        | 35.37               | 0.1979              | 0.1345               | 0.0407               | 0.0439               | Buzzio and Castro-Vazquez 2002            |
| <i>Castor canadensis</i>          | 31       | 36480               | 9.3                 | 13.68                |                      |                      | Osborn 1953                               |
| <i>Cavia porcellus</i>            | 18       | 714.5               | 3.73                | 3.1                  |                      |                      | Warnock 1923                              |
| <i>Clethrionomys glareolus</i>    | 87       | 21.8                | 0.646               |                      |                      | 0.0442               | Humiński 1969                             |
| <i>Cynomys ludovicianus</i>       | 35       | 815                 | 4                   | 0.9                  |                      |                      | Kenagy & Trombulak 1986; Anthony 1953     |
| <i>Hydromys chrysogaster</i>      | 13       | 897.32              | 8.471               | 2.993                |                      |                      | Olsen 1982                                |
| <i>Hystrix africaeaustralis</i>   | 124      | 11790               | 6.649               | 5.067                |                      |                      | Van Aarde & Skinner 1986                  |
| <i>Mastomys natalensis</i>        |          | 49.2                | 1.19                | 0.36                 |                      |                      | Silva & Downing 1995; Neal 1977           |
| <i>Melomys littoralis</i>         |          | 61                  | 1.684               |                      |                      | 0.063                | Breed & Sarafis 1978                      |
| <i>Micromys minutus</i>           | 9        | 7.8                 | 0.178               |                      |                      | 0.0065               | Humiński 1969                             |
| <i>Microtus agrestis</i>          | 31       | 34.35               | 0.5406              | 0.238                |                      | 0.0395               | Clarke & Forsyth 1964                     |
| <i>M. arvalis</i> <sup>6</sup>    | 395      | 28.5                | 0.424               |                      |                      | 0.041                | Humiński 1958                             |
| <i>M. arvalis</i> <sup>6</sup>    |          | 21.2                | 0.199               | 0.175                |                      | 0.008                | Delost 1951                               |
| <i>M. oeconomus</i>               | 10       | 34.8                | 0.419               |                      |                      | 0.0372               | Humiński 1969                             |
| <i>Mus musculus</i> <sup>6</sup>  | 6        | 21.1                | 0.181               | 0.303                |                      |                      | S. A. Ramm, unpubl. data                  |
| <i>M. musculus</i> <sup>6</sup>   | 36       | 15.3                | 0.119               |                      |                      | 0.008                | Humiński 1969                             |
| <i>Notomys alexis</i>             | 12       | 34                  | 0.05                |                      |                      | 0.105                | Breed 1986                                |
| <i>N. cervinus</i>                | 2        | 33                  | 0.198               | 0.182                | 0.025                | 0.106                | Breed 1986                                |
| <i>N. fuscus</i>                  | 1        | 44                  | 0.062               |                      |                      | 0.09                 | Breed 1986                                |

**Appendix C contd.**

| <b>Species</b>               | <b>n</b> | <b>BM<sup>1</sup> (g)</b> | <b>TM<sup>2</sup> (g)</b> | <b>SVM<sup>3</sup> (g)</b> | <b>APM<sup>4</sup> (g)</b> | <b>VPM<sup>5</sup> (g)</b> | <b>Source(s)</b>     |
|------------------------------|----------|---------------------------|---------------------------|----------------------------|----------------------------|----------------------------|----------------------|
| <i>N. mitchelli</i>          | 8        | 39                        | 0.062                     |                            |                            | 0.174                      | Breed 1982           |
| <i>Ondatra zibethica</i>     | 5        | 1105                      | 5.064                     | 4.887                      | 0.259                      |                            | Beer & Meyer 1951    |
| <i>Pedetes capensis</i>      | 93       | 3230                      | 18.24                     | 9.6                        |                            |                            | Butynski 1979        |
| <i>Pitymys subterraneus</i>  | 17       | 17.1                      | 0.237                     |                            |                            | 0.055                      | Humiński 1969        |
| <i>Pseudomys apodemoides</i> | 7        | 31                        | 0.141                     | 0.142                      | 0.018                      | 0.012                      | Breed 1982           |
| <i>P. australis</i>          | 13       | 59                        | 2.242                     | 0.865                      | 0.272                      | 0.09                       | Breed 1982           |
| <i>P. delicatulus</i>        | 3        | 8                         | 0.05                      | 0.032                      | 0.018                      | 0.01                       | Breed 1982           |
| <i>P. desertor</i>           | 1        | 39                        | 0.558                     | 0.202                      | 0.056                      | 0.022                      | Breed 1982           |
| <i>P. hermannsburgensis</i>  | 7        | 18                        | 0.163                     | 0.122                      | 0.022                      | 0.048                      | Breed 1982           |
| <i>P. nanus</i>              | 6        | 78                        | 1.874                     | 0.694                      | 0.257                      | 0.097                      | Breed 1982           |
| <i>P. novaehollandiae</i>    | 2        | 19                        | 0.071                     | 0.086                      | 0.032                      | 0.065                      | Breed 1982           |
| <i>P. shortridgei</i>        | 2        | 78                        | 0.345                     | 0.222                      | 0.06                       | 0.02                       | Breed 1982           |
| <i>Rattus assimilis</i>      |          | 115                       | 4.8                       | 1                          |                            |                            | Taylor 1961          |
| <i>R. fuscipes</i>           |          | 100                       | 4.41                      |                            |                            | 0.247                      | Breed & Sarafis 1978 |
| <i>R. norvegicus</i>         | 19       | 500                       | 4                         | 1.115                      |                            |                            | Pessah & Kochva 1975 |
| <i>Spermophilus beecheyi</i> | 67       | 626                       | 6.657                     | 1.897                      |                            |                            | Tomich 1962          |
| <i>S. beldingi</i>           | 29       | 210                       | 0.795                     | 0.94                       |                            |                            | McKeever 1963        |
| <i>Zyzomys argurus</i>       |          | 53                        | 0.4                       |                            |                            | 0.043                      | Breed & Sarafis 1978 |

<sup>1</sup> body mass;

<sup>2</sup> paired testis mass;

<sup>3</sup> paired seminal vesicles mass;

<sup>4</sup> paired anterior prostate mass;

<sup>5</sup> paired ventral prostate mass;

<sup>6</sup> differing testis and body mass data reported in studies measuring different accessory glands.



## Appendix D

Copulatory plug size, vaginal length and relative testis size in rodents.

| Species                      | PL <sup>1</sup> | VL <sup>2</sup> | RTS <sup>3</sup> | RTS Source(s)                             |
|------------------------------|-----------------|-----------------|------------------|-------------------------------------------|
| <i>Microtus californicus</i> | 4.9             | 7.4             | 0.35             | Kenagy & Trombulak 1986                   |
| <i>M. montanus</i>           | 5.9             | 8.7             | 0.68             | Pierce et al. 1990                        |
| <i>M. ochrogaster</i>        | 5.8             | 8.5             | 0.88             | Pierce et al. 1990                        |
| <i>M. oeconomus</i>          | 6.1             | 9.3             | 0.88             | Kenagy & Trombulak 1986                   |
| <i>M. pennsylvanicus</i>     | 9.2             | 10.1            | 1.73             | Pierce et al. 1990                        |
| <i>Peromyscus eremicus</i>   | 7.5             | 12.1            | 0.64             | Linzey & Layne 1969; Silva & Downing 1995 |
| <i>P. gossypinus</i>         | 6.4             | 10.1            | 1.54             | Linzey & Layne 1969; Silva & Downing 1995 |
| <i>P. leucopus</i>           | 8.0             | 10.3            | 0.77             | Linzey & Layne 1969; Silva & Downing 1995 |
| <i>P. maniculatus</i>        | 8.0             | 9.1             | 1.29             | Kenagy & Trombulak 1986                   |
| <i>P. mexicanus</i>          | 10.5            | 15.5            | 0.94             | Linzey & Layne 1969; Silva & Downing 1995 |
| <i>P. polionotus</i>         | 7.5             | 10.0            | 0.43             | Linzey & Layne 1969; Silva & Downing 1995 |
| <i>Mesocricetus auratus</i>  | 9.0             | 11.3            | 2.78             | Kenagy & Trombulak 1986                   |

<sup>1</sup> copulatory plug length (mm), from Baumgardner et al. (1982);

<sup>2</sup> vaginal length (mm), from Baumgardner et al. (1982);

<sup>3</sup> relative testis size (based on the rodent regression equation calculated by Kenagy and Trombulak 1986).

## References

- Anthony, A. 1953 Seasonal reproductive cycle in the normal and experimentally treated male prairie dog, *Cynomys ludovicianus*. *J. Morphol.* **93**, 331-369.
- Baker, R. J., Makova, K. D. & Chesser, R. K. 1999 Microsatellites indicate a high frequency of multiple paternity in *Apodemus* (Rodentia). *Mol. Ecol.* **8**, 107-111.
- Baumgardner, D. J., Hartung, T. G., Sawrey, D. K., Webster, D. G. & Dewsbury, D. A. 1982 Muroid copulatory plugs and female reproductive tracts: a comparative investigation. *J. Mammal.* **63**, 110-117.
- Baverstock, P. R., Watts, C. H. S., Adams, M. & Cole, S. R. 1981 Genetical relationships among Australian rodents (Muridae). *Aust. J. Zool.* **29**, 289-303.
- Birdsall, D. A. & Nash, D. 1973 Occurrence of successful multiple insemination of females in natural populations of deer mice (*Peromyscus maniculatus*). *Evolution* **27**, 106-110.
- Boellstorff, D. E., Owings, D. H., Penedo, M. C. T. & Hersek, M. J. 1994 Reproductive behaviour and multiple paternity of California ground squirrels. *Anim. Behav.* **47**, 1057-1064.
- Boonstra, R., Xia, X. & Pavone, L. 1993 Mating system of the meadow vole, *Microtus pennsylvanicus*. *Behav. Ecol.* **4**, 83-89.
- Beer, J. R. & Meyer, R. K. 1951 Seasonal changes in the endocrine organs and behavior patterns of the muskrat. *J. Mammal.* **32**, 173-191.
- Breed, W. G. 1982 Morphological variation in the testes and accessory sex organs of Australian rodents in the genera *Pseudomys* and *Notomys*. *J. Reprod. Fertil.* **66**, 607-613.
- Breed, W. G. 1986 Comparative morphology and evolution of the male reproductive tract in the Australian hydromyine rodents (*Muridae*). *J. Zool. Lond. A* **209**, 607-629.
- Breed, W. G. & Adams, M., 1992 Breeding systems of Spinifex hopping mice (*Notomys alexis*) and plains rats (*Pseudomys australis*): a test of multiple paternity within the laboratory. *Aust. J. Zool.* **40**, 13-20.
- Breed, W. G. & Sarafis, V. 1978 On the phylogenetic significance of spermatozoal morphology and male reproductive tract anatomy in Australian rodents. *Trans. R. Soc. S. Aust.* **103**, 127-135.

- Butynski, T. M. 1979 Reproductive ecology of the springhaas *Pedetes capensis* in Botswana. *J. Zool.* **189**, 221-232.
- Buzzio, O. L. & Castro-Vazquez, A. 2002 Reproductive biology of the corn mouse, *Calomys musculus*, a neotropical sigmodontine. *J. Neotrop. Mammal.* **9**, 135-158.
- Clarke, J. R. & Forsyth, I. A. 1964 Seasonal changes in the gonads and accessory reproductive organs of the vole (*Microtus agrestis*). *Gen. Comp. Endocrinol.* **4**, 233-242.
- Corbet, G. B. & Hill, J. E. 1991 *A world list of mammalian species*, 3rd ed. Oxford University Press.
- Delost, P. 1951 État de l'appareil génital du Campagnol des champs (*Microtus arvalis*) de sexe mâle en hiver. *Bull. Soc. Hist. Nat. Toulouse* **86**, 133-150.
- Dewsbury, D. A. & Hodges, A. W. 1987 Copulatory behaviour and related phenomena in spiny mice (*Acomys cahirinus*) and hopping mice (*Notomys alexis*). *J. Mammal.* **68**, 49-57.
- Eriksson, M. 1981 The bulbourethral gland of the wood mouse, *Apodemus sylvaticus*. *J. Mammal.* **62**, 375-378.
- Foreman, D. 1998 Effects of exogenous hormones on spermatogenesis in the male prairie dog (*Cynomys ludovicianus*). *Anat. Rec.* **250**, 45-61.
- Hanken, J. & Sherman, P. W., 1981 Multiple paternity in Belding's ground squirrels. *Science* **212**, 351-353.
- Hayssen, V., van Tienhoven, A. & van Tienhoven, A. 1993 *Asdell's patterns of mammalian reproduction*. London: Comstock.
- Herron, M. D., Castoe, T. A. & Parkinson, C. L. 2004 Sciurid phylogeny and the paraphyly of Holarctic ground squirrels (*Spermophilus*). *Mol. Phylogenet. Evol.* **31**, 1015-1030.
- Hohoff, C., Solmsdorff, K., Löttker, P., Kemme, K., Epplen, J. T., Cooper, T. G. & Sachser, N. 2002 Monogamy in a new species of wild guinea pigs (*Galea* sp.). *Naturwissenschaften* **89**, 462-465.
- Hoogland, J. L. 1995 *The black-tailed prairie dog: social life of a burrowing mammal*. University of Chicago Press.
- Hoogland, J. L. & Foltz, D. W. 1982 Variance in male and female reproductive success in a harem-polygynous mammal, the black-tailed prairie dog (Sciuridae: *Cynomys ludovicianus*). *Behav. Ecol. Sociobiol.* **11**, 155-163.

- Hooper, E. T. & Musser, G. G. 1964 The glans penis in neotropical cricetines (family Muridae) with comments on classification of muroid rodents. *Misc. Publ. Mus. Zool. Univ. Mich.* **123**, 1-57.
- Humiński, S. 1958 The autumnal involution of the male sexual apparatus in the field vole (*Microtus arvalis* Pall.). *Zool. Pol.* **9**, 197-214.
- Humiński, S. 1969 Biomorphological studies on testes and male accessory glands in some species of the families *Muridae* and *Microtidae* found in Poland. *Zool. Pol.* **19**, 213-255.
- Kenagy, G. J. & Trombulak, S. C. 1986 Size and function of mammalian testes in relation to body size. *J. Mammal.* **67**, 1-22.
- Linzey, A. V. & Layne, J. N. 1969 Comparative morphology of the male reproductive tract in the rodent genus *Peromyscus* (Muridae). *Amer. Mus. Nov.* **2355**, 1-47.
- Liu, F.-G. R., Miyamoto, M.M., Freire, N. P., Ong, P. Q., Tennant, M. R., Young, T. S. & Gugel, K. F. 2001 Molecular and morphological supertrees for Eutherian (placental) mammals. *Science* **291**, 1786-1789.
- Martin, Y., Gerlach, G., Schlotterer, C. & Meyer, A. 2000 Molecular phylogeny of European muroid rodents based on complete cytochrome b sequences. *Mol. Phylogenet. Evol.* **16**, 37-47.
- McKeever, S. 1963 Seasonal changes in body weight, reproductive organs, pituitary, adrenal glands, thyroid gland, and spleen of the Belding ground squirrel (*Citellus beldingi*). *Am. J. Anat.* **113**, 153-173.
- Neal, B. R. 1977 Reproduction of the multimammate rat, *Praomys (Mastomys) natalensis* (Smith), in Uganda. *Z. Säugetierkunde* **42**, 221-231.
- Nelson, R. J., Gubernick, D. J. & Blom, J. M. C. 1995 Influence of photoperiod, green food, and water availability on reproduction in male Californian mice (*Peromyscus californicus*). *Physiol. Behav.* **57**, 1175-1180.
- Olsen, P. D. 1982 Reproductive biology and development of the water rat, *Hydromys chrysogaster*, in captivity. *Aust. Wildl. Res.* **9**, 39-53.
- Osborn, D. J. 1953 Age classes, reproduction, and sex ratios of Wyoming beaver. *J. Mammal.* **34**, 27-44.

- Pierce, J. D., Jr, Ferguson, B., Salo, A. L., Sawrey, D. K., Shapiro, L. E., Taylor, S. A. & Dewsbury, D. A. 1990 Patterns of sperm allocation across successive ejaculates in four species of voles (*Microtus*). *J. Reprod. Fertil.* **88**, 141-149.
- Peitz, B., Foreman, D. & Schmitt, M. 1979 The reproductive tract of the male spiny mouse (*Acomys cahirinus*) and coagulation studies with other species. *J. Reprod. Fertil.* **57**, 183-188.
- Pessah, H. & Kochva, E. 1975 The secretory activity of the seminal vesicles in the rat after copulation. *Biol. Reprod.* **13**, 557-560.
- Pierce, J. D., Jr, Ferguson, B., Salo, A. L., Sawrey, D. K., Shapiro, L. E., Taylor, S. A. & Dewsbury, D. A. 1990 Patterns of sperm allocation across successive ejaculates in four species of voles (*Microtus*). *J. Reprod. Fertil.* **88**, 141-149.
- Ratkiewicz, M. & Borkowska, A. 2000 Multiple paternity in the bank vole (*Clethrionomys glareolus*): field and experimental data. *Z. Saugetierkd.* **65**, 6-14.
- Ribble, D. O. 1991 The monogamous mating system of *Peromyscus californicus* as revealed by DNA fingerprinting. *Behav. Ecol. Sociobiol.* **29**, 161-166.
- Sachser, N., Schwarz-Weig, E., Keil, A. & Epplen, J. T. 1999 Behavioural strategies, testis size, and reproductive success in two caviomorph rodents with different mating systems. *Behav.* **136** 1203-1217.
- Schulte-Hostedde, A. I. & Millar, J. S. 2004 Intraspecific variation of testis size and sperm length in the yellow-pine chipmunk (*Tamias amoenus*): implications for sperm competition and reproductive success. *Behav. Ecol. Sociobiol.* **55**, 272-277.
- Schulte-Hostedde, A. I., Millar, J. S. & Gibbs, H. L., 2004 Sexual selection and mating patterns in a mammal with female-biased sexual size dimorphism. *Behav. Ecol.* **15**, 351-356.
- Silva, M. & Downing, J. A. 1995 *CRC Handbook of Mammalian Body Masses*. Boca Raton, Fla: CRC Press.
- Stangl, F. B. & Baker, R. J. 1984 Evolutionary relationships in *Peromyscus*: congruence in chromosomal, genic, and classical data sets. *J. Mamm.* **65**, 643-654.
- Steppan, S. J., Adkins, R. M. & Anderson, J. 2004 Phylogeny and divergence-date estimates of rapid radiations in muroid rodents based on multiple nuclear genes. *Syst. Biol.* (in press).

- Taylor, J. M. 1961 Reproductive biology of the Australian bush rat, *Rattus assimilis*. *Univ. Calif. Publ. Zool.* **60**, 1-66.
- Tomich, P. Q. 1962 The annual cycle of the California ground squirrel *Citellus beecheyi*. *Univ. Calif. Publ. Zool.* **65**, 213-282.
- Topping, M. G. & Millar, J. S. 1998 Mating patterns and reproductive success in the bushy-tailed woodrat (*Neotoma cinerea*), as revealed by DNA fingerprinting. *Behav. Ecol. Sociobiol.* **43**, 115-124.
- Van Aarde, R. J. & Skinner, J. D. 1986 Reproductive biology of the male Cape porcupine, *Hystrix africaeaustralis*. *J. Reprod. Fertil.* **76**, 545-552.
- Van der Horst, G. 1972 Seasonal effects on the anatomy and histology of the reproductive tract of the male rodent mole *Bathyergus suillus suillus* (Schreber). *Zool. Afr.* **7**, 491-520.
- Warnock, A. W. 1923 The anatomy of the seminal vesicles of the guinea-pig, *Cavia cobaya*. *Anat. Rec.* **25**, 275-287.
- Watts, C. H. S. & Baverstock, P. R., Birrell, J. & Krieg, M. 1992 Phylogeny of the Australian rodents (Muridae): a molecular approach using microcomplement fixation of albumin. *Aust. J. Zool.* **40**, 81-90.
- Yunes, R. M. F. & Castro-Vazquez, A. 1990 An unusual pattern of copulatory behavior in a South American cricetid rodent: *Akodon molinae*. *J. Comp. Psychol.* **104**, 263-267.
